# Supplementary material for: Transcriptomic responses to emamectin benzoate in Pacific and Atlantic Canada salmon lice Lepeophtheirus salmonis with differing levels of drug resistance
Source: PubMed Central journal article supplement (PMC4319862; doi:10.1111/eva.12237), 2014-12-22

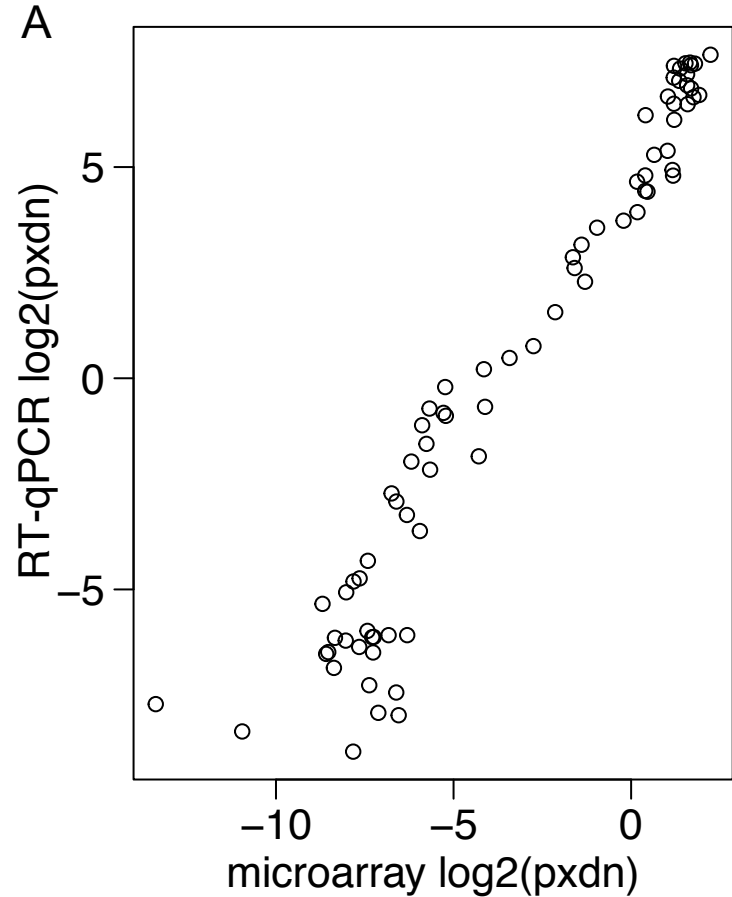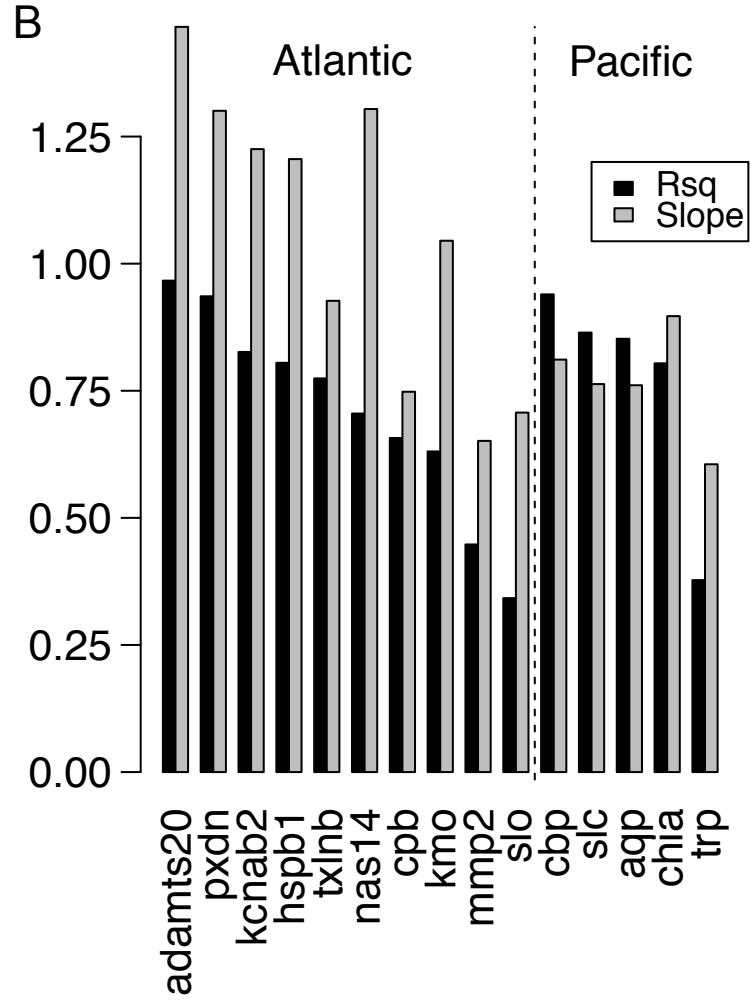

Supplement: eva0008-0133-sd1.pdf [file eva0008-0133-sd1.pdf]
